# Supplementary material
Source: publisher figshare collection journal article supplement (https://acs.figshare.com/ndownloader/files/14066291)
Supplement: Supplementary file 1 [file 14066291]

## Supplementary Materials

# **Rationally design nanostructure features on superhydrophobic surfaces for enhancing the self-propelling dynamics of condensed droplets**

Yizhou Shen<sup>†,\*</sup>, Yuehan Xie<sup>†</sup>, Jie Tao<sup>†,‡,\*</sup>, Haifeng Chen<sup>‡</sup>, Chunling Zhu<sup>§</sup>, Mingming

Jin<sup>†</sup>, Yang Lu<sup>†</sup>

<sup>†</sup> College of Materials Science and Technology, Nanjing University of Aeronautics and Astronautics, Nanjing 210016, P. R. China

<sup>‡</sup> Department of Materials Chemistry, Qiuzhen School, Huzhou University, 759, East 2nd Road, Huzhou 313000, P. R. China

<sup>§</sup> College of Aerospace Engineering, Nanjing University of Aeronautics and Astronautics, Nanjing 210016, P. R. China

<sup>‡</sup> Jiangsu Collaborative Innovation Center for Advanced Inorganic Function Composites, Nanjing 210009, P. R. China

\* Professor Jie Tao, Tel/Fax: +86-25-5211 2911. E-mail: taojie@nuaa.edu.cn.

A/Professor Yizhou Shen, Tel: +86-25-5211 2911. E-mail: shenyizhou@nuaa.edu.cn.



## Supplementary Figures

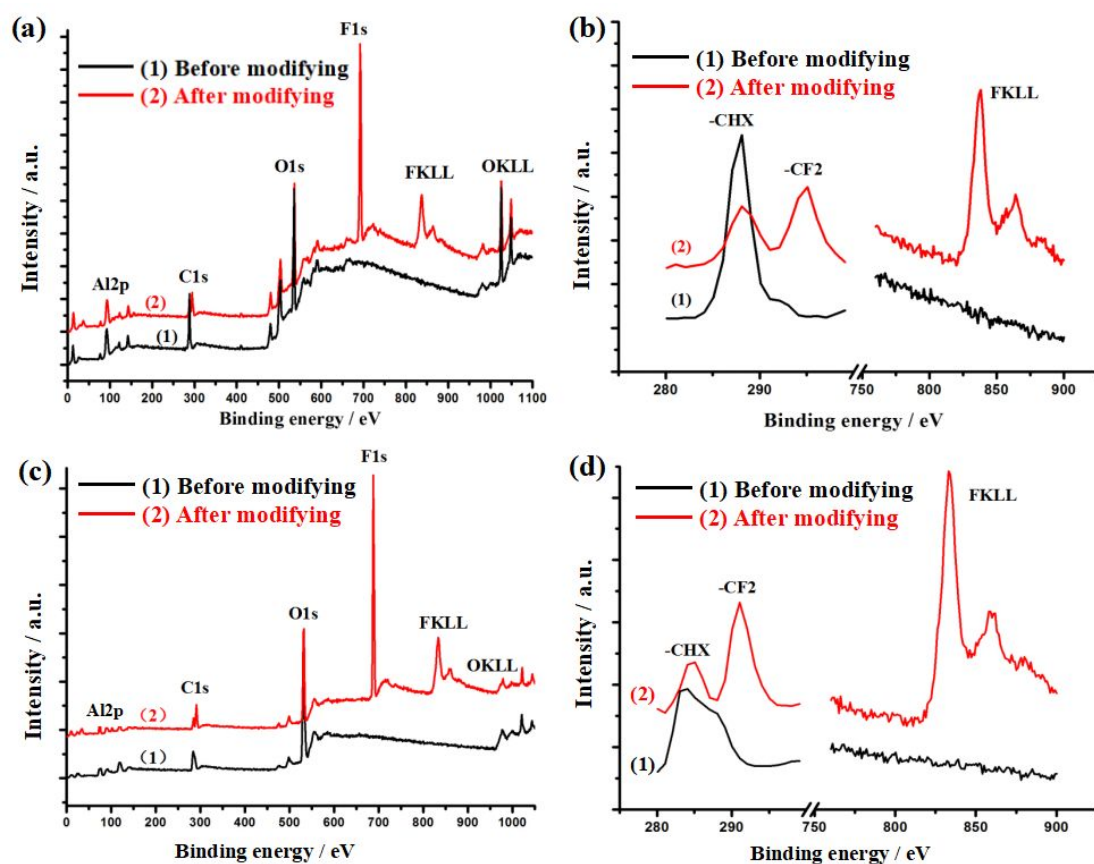

**Figure. S1.** The XPS spectrum (1) before and (2) after self-assembling with the hydrophobic groups for (a-b) SLP-surface and (c-d) OC-surface.

### **Supplementary Videos**

**Video S1.** The process of spreading, contraction and rebounding when a droplet impacts on different surfaces.

**Video S2.** The condensed micro-droplets merging process on layered porous structural surface by a high-speed camera at side-view.

**Video S3** The self-propelling bouncing behavior of the coalesced droplets on open nanocone superhydrophobic surface by a high-speed camera at side-view during the condensing process.
